# Supplementary material
Source: publisher figshare collection journal article supplement (https://tandf.figshare.com/ndownloader/files/17513078)
Supplement: Supplementary file 1 [file 17513078]

**Supplementary Material for**

**Impact of co-doping concentration in copolymer network liquid crystals**

**Fatemeh Jahanbakhsh1,2 and Alexander Lorenz1,3,***

1Institute of Chemistry, University of Kassel, Heinrich Plett Str. 40, 34132 Kassel, Germany

2Department of Laser and Optical Engineering,University of Bonab, Bonab, Iran

3Department of Chemistry, Physical Chemistry, Paderborn University, Warburger Str. 100, 33098 Germany


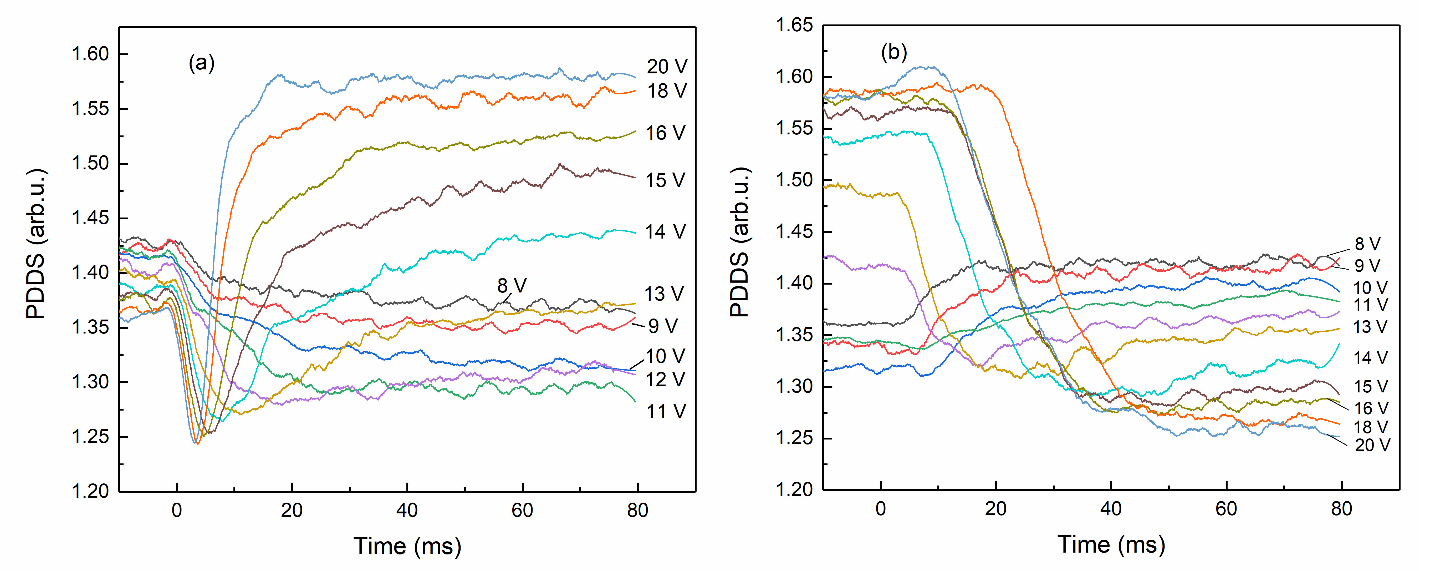


Figure S1. Electro-optic response curves measured in sample A, recorded at various addressing voltages. (a) Upon switching the addressing signal on and (b) upon switching the addressing signal off.


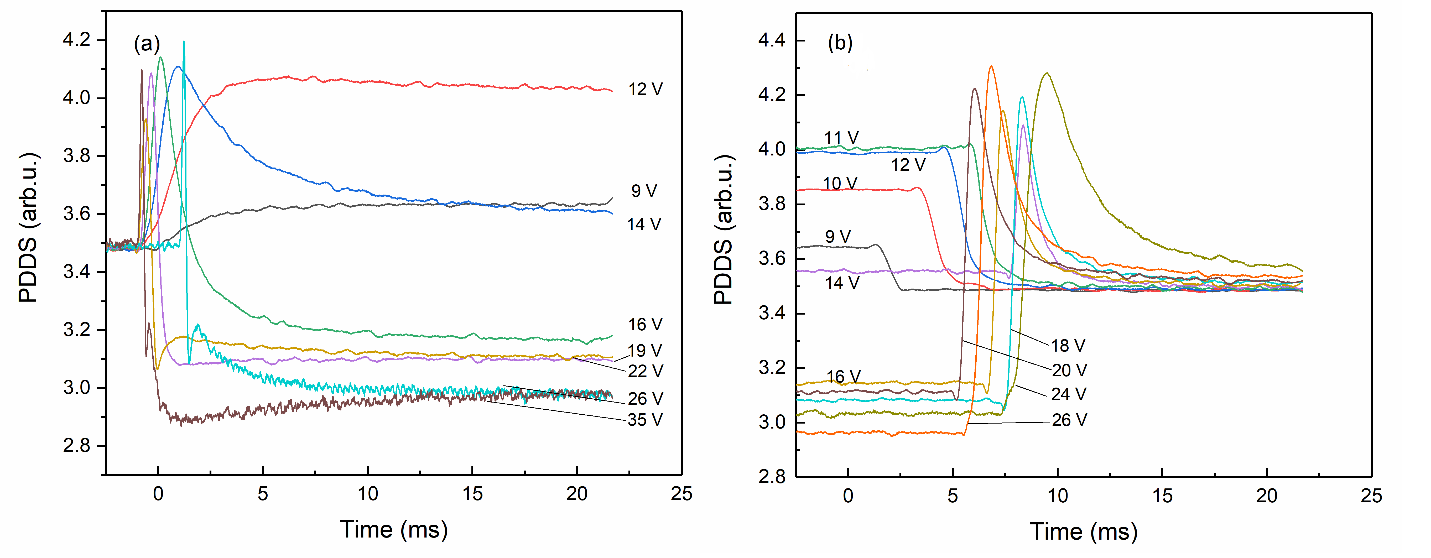


Figure S2. Electro-optic response curves measured in sample C, recorded at various addressing voltages. (a) Upon switching the addressing signal on and (b) upon switching the addressing signal off.


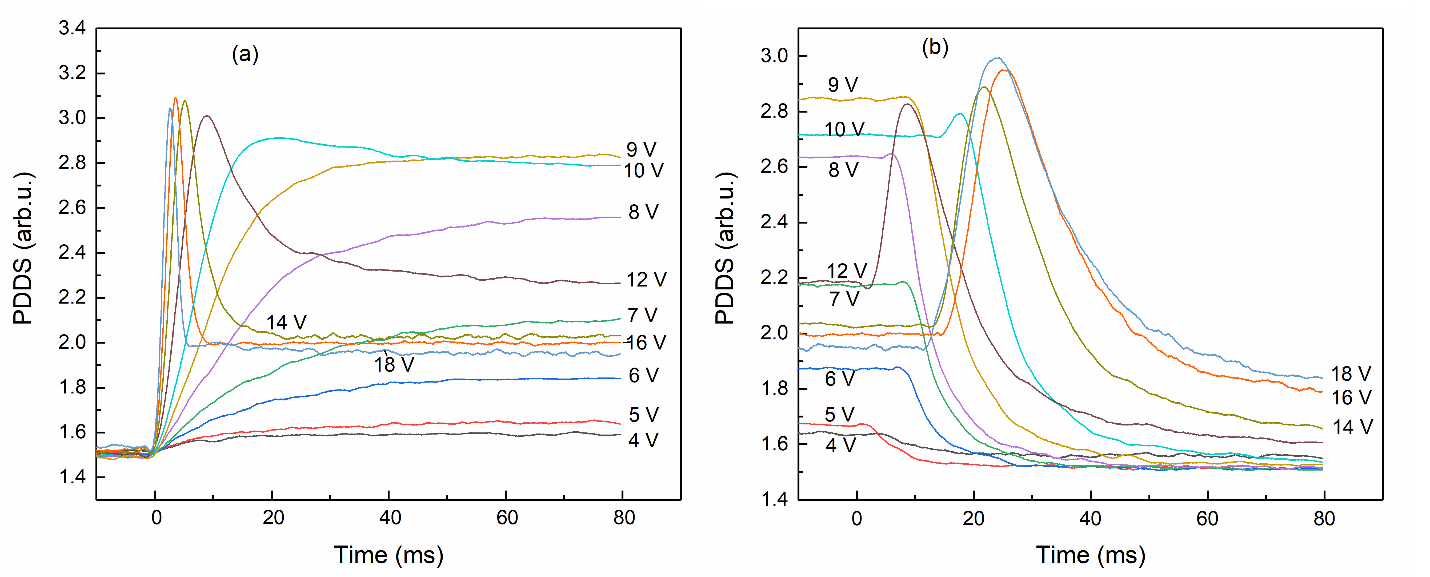


Figure S3. Electro-optic response curves measured in sample D, recorded at various addressing voltages. (a) Upon switching the addressing signal on and (b) upon switching the addressing signal off.


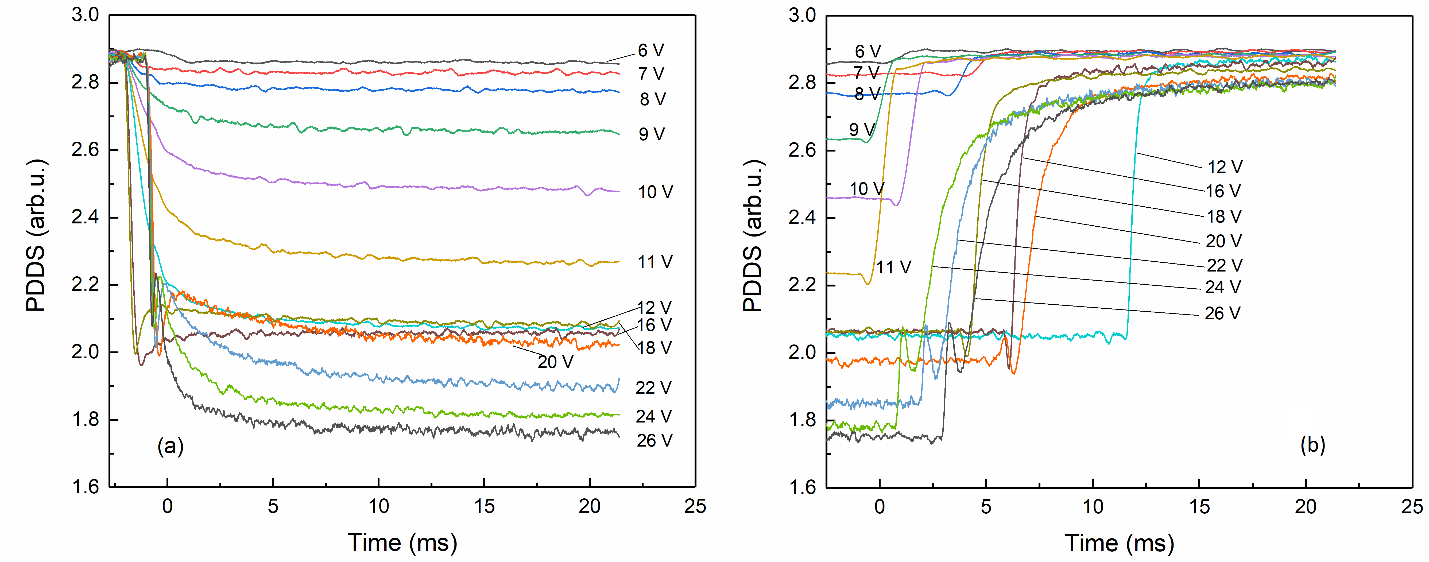


Figure S4. Electro-optic response curves measured in sample E, recorded at various addressing voltages. (a) Upon switching the addressing signal on and (b) upon switching the addressing signal off.


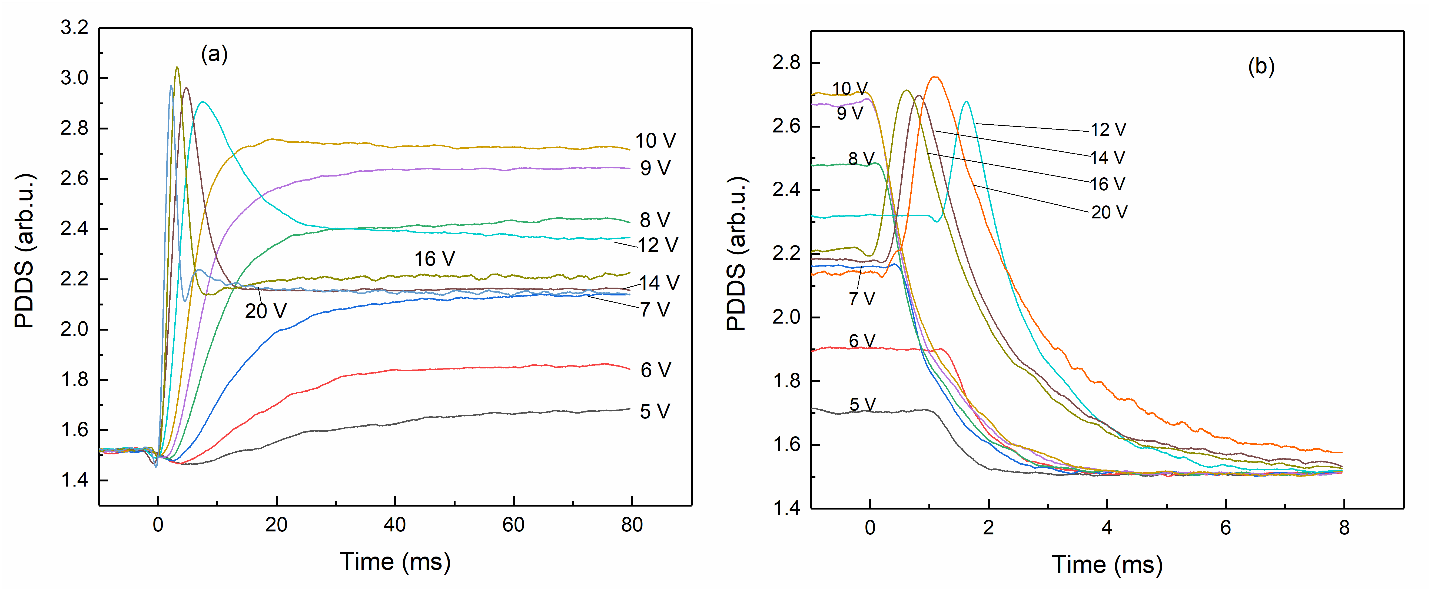


Figure S5. Electro-optic response curves measured in sample F, recorded at various addressing voltages. (a) Upon switching the addressing signal on and (b) upon switching the addressing signal off.
